# Supplementary material for: Practitioner perspectives on extended difficulties and optimal support strategies following psychedelic experiences: A qualitative analysis
Source: Research Square preprint supplement (doi:10.21203/rs.3.rs-6303856/v1), 2025-05-13
Supplement: Supplementary file 1 [file 368ca00620317be1036f63b4.xlsx]

## Sheet: Difficulties Data
Participants	Group	Group coded	When clients or patients present with difficulties after using psychedelics, please describe the three difficulties you most commonly see? Please write a brief paragraph describing each one.	Sense of social alienation or disconnection	Visual or auditory hallucinations / visual disturbance	Flashbacks / feeling of experience being repeated	Sleep problems and nightmares	Substance use / abuse	Cognitive confusion	Fixated or intrusive thoughts	Forgetfulness / memory issues	Difficulty with concentration and focusing	Anxiety and/or panic	Paranoia	Feeling unsafe and out of control	Low mood / bad mood / sadness / anhedonia	Manic / Hypomanic episode	Depression	Shame / guilt	Anger / irritability	Suicidal thoughts	Emotional overwhelm	Fluctuating emotions and mood swings	Hyperarousal / hypersensitivity / hypervigilance	Becoming conscious of repressed / hidden memories, emotions and fantasies	Traumatized or hurt by trip or what happened after	Unmet expectations and disappointment relating to experience and outcome	Existential struggle and crisis	Feelings of Grief and Remorse	Sense of demonic or hostile presence	Dissocative symptoms: Depers and dereal	psychotic like symptoms	Disempowered and negative self-perception	Ego or identity confusion	Self-Perception Issues	Difficulty with performing daily tasks / work / studying
P01	Psychiatrist	1	1. persisting identity confusion, existential crisis, or psychological fragmentation. Can also manifest as confusion about whether things happened in their past or present. calm psychological support and grounding without overlying reinforcing any specific idea or interpretation 2. Disappointment with experience not being curative or completely transformative. Tolerance of splitting again without…																								1	1			1			1	1
P02	Psychiatrist	1	HPPD Depersonalization / derealization syndrome Anxiety		1								1																		1
P03	Psychiatrist	1	1) Paradigm shift issues and Ego-issues. Paradigm shift issues: The psychedelic experience contradicts our Western materialistic paradigm. Leading to disorientation, anxiety, obsessive thinking, difficulties to concentrate. Ego-issues: Ego dissolution leading to existential crises, anxiety, confusion, loss of meaning. Ego inflation leading to dysfunctional behaviour. 2) Uncalled disclosures. Dest…		1				1	1		1	1												1			1		1				1	1
P04	Psychiatrist	1	1) struggle to adjust to usual life, both mentally and physically: This generally includes a wide variety of difficulties like, a sense of social disconnection and isolation from others. Cognitive difficulties like confusion, lack of focus and processing abilities. Emotional difficulties, like emotional disregulation, paranoia, perception of lacking or loosing control. Existential disconfort, lik…	1					1			1		1									1				1	1						1	1	1
P05	Psychiatrist	1	1) c he thought he were going to die, and after the experience he developed depression, flashbacks, nightmares and panic attacks. He also experienced derealisation symptoms and sporadically thoughts that he was actually already dead (short lost of reality check during panick attacks) 2) a lasting period of manic psychotic delusion (being the new messiah that has to save the world) after use of ps…			1	1	1					1				1	1								1					1	1		1	1
P06	Psychiatrist	1	Dissociation: This includes symptoms of depersonalization and derealization, often secondary to a traumatic experience with a psychedelic trip. Patients experiencing dissociation may report periods of lost time and a profound sense of disconnection from themselves, feeling as though the world around them is not real. This can be a distressing state, significantly impairing their ability to engage…		1									1			1									1					1	1		1	1	1
P07	Psychiatrist	1	Anxiety - a couple of patients experienced increased anxiety and tension in the weeks after their psychedelic experience. This seemed to be generalised in nature and not directly linked to the content of their experience. Hypnagogia/flashback experiences around sleep - re-experiencing similar psychedelic-like experiences when going to sleep or waking up. The patient we supported had previous expe…			1					1	1	1
SUM Psychiatrists		N = 7		1	3	2	1	1	2	1	1	3	4	2	0	0	2	1	0	0	0	0	1	0	1	2	2	3	0	1	4	2	0	5	5	2
P08	Psychotherapist	2	1. Extreme anxiety and paranoia / panic attacks. Anxiety seems to be related to the sense of loss of control, and can continue weeks or months post ingestion. 2. Derealization and depersonalization. Clients have an unpleasant and lingering sense that things no longer feel real, or they themselves are no longer real. 3. Existential distress and confusion. This can coexist with depersonalization an…							1			1	1	1													1			1
P09	Psychotherapist	2	Depersonalisation/Derealisation- feeling outside of one's body/self, feeling like things around them are not 'real' or difficult deciphering what is real and what is not Exacerbation to symptoms- increased anxiety, depression, feelings of dread Flooding of trauma material- emergence/re-emergence of non-continuously held memories that have surfaced in the process that the client is finding difficu…										1					1				remove (covered in resurfaced)			1						1
P10	Psychotherapist	2	Lack of preparation or psycho-education - Some form of ontological shock - especially with DMT And Ayahuasca retreats. Individuals lack awareness of what to expect and have no frame of reference for their experiences. Clash of cosmologies - western mindset with shamanic cosmology. This can be quite destabilising for individuals. The set and setting were not good, at a festival where it's too over…																			overwhelm relates to during here				1		1
P11	Psychotherapist	2	1- People can’t make sense of the changes they experiment due to the impact that psychedelics pose to the perception they have on themselves. (People don’t know who they are, or who they were) 2- Expectations not met. People have great expectations about what psychedelics can do. They expect magic resolutions and are waiting to be “changed” by them without their own personal work. 3- Trying to gi…																								1	1						1	1
P12	Psychotherapist	2	Three difficulties I commonly hear in relation to psychedelic work: 1) A question of past child sexual abuse People can be shocked that their memory does not operate like a computer or CCTV. That their human memory is symbolic, associative, ambiguous, fragmented and unreliable. For some, their psychedelic experiences generate terrifying questions about whether they were abused as a child e.g. a p…						1	1			1	1	1										1			1					1		1	1
P13	Psychotherapist	2	Difficulty regulating openness/heightened sensitivity: Following an intense journey, it is not uncommon for someone to have heightened sensitivity and sustained openness. The challenge arises when, during the integration phase, the person is not well-resourced with emotionally safe persons, family, community who can hold space for them to freely express their feelings outside of the therapeutic i…	1									1				1		1					1			1									1
P14	Psychotherapist	2	"- Struggle to make sense of an intense psychedelic experience, confusion - Anxiety symptoms - Low mood"										1			1												1
SUM Psychotherapists		N = 7		1	0	0	0	0	1	2	0	0	5	2	2	1	1	1	1	0	0	0	0	1	2	1	2	5	0	0	2	0	1	1	2	2
P15	Integration coach	3	The contraction phase following the afterglow. Challenging/traumatic material arising Repressed anger towards a care giver																	1		remove (covered in resurfaced)			1
P16	Integration coach	3	Anxiety and fear. This often seems to come from overwhelm of the nervous system (trauma). After the nervous system seems to be on high alert, looking for threats (a client recently told me that when he looks at inanimate objects they look somewhat ominous or threatening). Depersonalization and derealization. A sense of not being oneself, not identifying with one's body, and things not being real.…							1			1	1								1		1		1					1		1		1
P17	Integration coach	3	There is something that I think is important that I want to note. I don't believe psychedelic difficulties exist in a vacuum. I don't think psychedelics are an escape. They are a continuation of the client's life issues. Usually, the difficulties that people present are either exacerbations of or compensations for the difficulties that they have been struggling with throughout their lives. That s…						1				1		1		1		1									1					1	1	1
P18	Integration coach	3	1. They were not sufficiently prepared for psychedelics and did not understand that psychedelics would not be a quick fix and have no idea how to integrate difficult experiences 2. They did not understand their mental health or Trauma history enough to work through their Trauma and leave the psychedelic experience activated, dissociated, and experiencing derealization and depersonalization - and …																			removed			1	1	1				1
P19	Integration coach	3	Unease with feeling different Unease with feeling a lot Unease with keeping inner peace	1																		1
P20	Integration coach	3	1) mood swings: Clients complain about mood swings during the day or from one day to another. Mostly they suffer from feeling down, sad and doubting themselves or doubting the experience. 2) suicidal thoughts: the clients that I saw, were suffering from these thoughts right after the journey or the day after. In some cases these thoughts occasionally came up within the two weeks after the experie…			1										1					1		1										1		1
P21	Integration coach	3	"1. What they expected or wanted to happen didn’t happen, and they’re disappointed or feel they got nothing out of the experience. 2. The support they received before and after the experience wasn’t sufficient and as a result, they are further confused by the experience. They might make big life decisions thinking they’re cured, only for the afterglow to fade and then realize they still have work…																								1	1
SUM Integration coaches		N = 7		1	0	1	0	0	1	1	0	0	2	1	1	1	1	0	1	1	1	2	1	1	2	2	2	2	0	0	2	0	3	1	3	0
P22	Retreat guide, facilitator, chaplain	4	1. Difficulty re-integrating into the societal structures after a mystical experience with 5-MeO-DMT. After a participant experiences the liberation of a mystical experience, in some cases it can be difficult to go back to one's normal environment. Perhaps they work in an office doing a job they don't love, live in an apartment downtown away from any nature, or are in a marriage that seems to be …	1																1		removed			1			1	1							1
P23	Retreat guide, facilitator, chaplain	4	"The most common is what I would describe as a sort of ""ontological shock"". These are individuals who tend to have a very rigid, ossified worldview before the dose, and often have very high expectations coming into the experience. The psychedelic experience inevitably challenges their worldview, often by bringing up feelings (deep shame, paranoia, etc.) that their entire lives have been organiz…											1					1			1					1	1
P24	Retreat guide, facilitator, chaplain	4	My main position on this is that anything can be therapeutic and beneficial if the correct support, integration and therapeutic supports are in place. In other words, even very challenging psychedelic processes can ultimately be beneficial, over time, if meaning can be found, That does not mean challenging psychedelic experiences do not occur, especially in the immediate aftermath of psychedelic …																			1			1	1		1				1
P25	Retreat guide, facilitator, chaplain	4	1) Facing unrecognised or hidden trauma; seeing or remembering events that contributed to their trauma, substance abuse / misuse, or chronic pain. It can be quite difficult for clients to remember or see what has been compartmentalised in order for them to survive. Once the memories surface, they often do not know how to handle the memories or information, and need a lot of support and compassion…	1			1								1										1				1
P26	Retreat guide, facilitator, chaplain	4	Immediately, dissociative episodes, coupled with confusion and depression, sometimes mania. In the long term, deppresion and lack of meaning.						1								1	1										1			1
P27	Retreat guide, facilitator, chaplain	4	One. People often have a hard time integrating back into their day-to-day lives, especially if they’re in urban areas. Two. Occasionally, people have changes in perspective on their lives or the world which create potential distance from people in their life. Three. People often question their work and life path	1																								1
P28	Retreat guide, facilitator, chaplain	4	The most common difficulty I have seen is from people doing psychedelics in large groups with little or no preparation or post integration. I avoid these issues by doing one on one or very small group sessions (Olly coment: not really a valid answer - maybe get one more)
SUM Retreat facilitators/guides		N = 7		3	0	0	1	0	1	0	0	0	0	1	1	0	1	1	1	1	0	2	0	0	3	1	1	5	2	0	1	1	0	0	0	1

## Sheet: Support Data
Participants	Group	Group coded	Please describe what you consider to the best approaches or techniques for supporting individuals who present with the difficulties you previously described. You could write a brief paragraph for each type of difficulty previously mentioned, in terms of what you feel helps alleviate these different difficulties.	Encouraging acceptance	Meditation and grounding practices	Being in nature	Breathing strategies and breathwork	Physical Exercise and movement practices	Sleep and rest	diet-based strategies	Creative strategies	Psychiatric medication	Abstaining from particular substances	Individual therapy subtheme: psychoeducation	Traditional healing giudance	Peer support and integration groups	Compassionate, non-judgemental presence	external acceptance and validation	facilitating self-understanding	helping make sense of experience	Providing reassurance	music	Individual therapy subtheme: ACT	Individual therapy subtheme: EMDR	Individual therapy subtheme: Parts work modalities (	Individual therapy subtheme: Somatic therapies and practices	Individual therapy subtheme: EFT	Individual therapy subtheme: Trauma work (TRE, trauma processing)	Individual therapy subtheme: Transpersonal, hypnosis, trance	Individual therapy subtheme: attachment-based psychodynamic work	Individual therapy subtheme: person centred and tailored	Individual therapy subtheme: CBT	Individual therapy subtheme: anger therapy practices	Individual psychotherapy	normalising the challenge	support finding purpose, fullfillment, self actualisation	plant medicine	screening related	prep related	ceremony protection - experience related
P01	Psychiatrist	1	I think having licensed mental health professionals with experience working with altered states of consciousness work with these drugs for treatment of mental illness is a very good way to minimize these risks and manage them when they arise. Practitioners need to be able to manage transference, intense affect, splitting, boundaries etc... that can all be made more difficult by the altered states…																															1
P02	Psychiatrist	1	HPPD - medication, meditation and acceptance-based psychotherapeutic techniques DP/DR - psychotherapy, sometimes medication Anxiety - depends strongly on type of anxiety and other aspects		1							1											1											1
P03	Psychiatrist	1	My approach is tailored to the client and practical. In one case I interpret the complaints as belonging to a psychiatric disorder, like Post Traumatic Stress Disorder, or agoraphobia. In another case I interpret the complaints as being transpersonal, like encountering a demon or hearing voices. I may understand physical complaints as only a physical condition, needing conventional medical care; …												1													1	1		1	1		1
P04	Psychiatrist	1	Ideally a mix of any supportive/analytical weekly psychotherapy that could help in: - gaining insight into personal conditions in order to help individuals understand and acquire new perspectives on their actual mindset and eventually relate it with their mental health issues and conditions. - enhance self-awareness in order to foster a deeper understanding of oneself, one's behaviors, and though…					1											1									1						1		1
P05	Psychiatrist	1	1) Combination of medication and trauma therapy (in that case EMDR). Medication stabilized to a reasanable degree daily anxiety and EMDR was quite effective in treating PTSD (desensitivation and reprocessing dead anxiety). 2) self recovery through peer community of frequent psychedelic users, still ongoing and patient with such a chaotic life, so difficult to disentagle which difficoulties are co…									1				1								1				1						1
P06	Psychiatrist	1	Dissociation: Therapy with a focus on trauma is the cornerstone for treating dissociation. This may involve cognitive-behavioral therapy (CBT), eye movement desensitization and reprocessing (EMDR), or other trauma-informed therapies. The goal is to help patients process and integrate the traumatic experiences that may have triggered the dissociative symptoms, fostering a sense of safety and conne…		1							1		1		1								1				1				1		1
P07	Psychiatrist	1	Anxiety - exploration of a possible focus of the anxiety, identify any exacerbating or relieving factors in their life, encouraging grounding practices, eg. meditation, being in nature, breathing techniques, self-compassion, encouraging sitting with it and not engaging in avoidance behaviours. Reassurance can be helpful. Ongoing (and possibly additional) integration support, in the context of a c…	1	1	1	1					1				1	1				1			1														1
SUM Psychiatrists		N = 7		1	3	1	1	1	0	0	0	4	0	1	1	3	1	0	1	0	1	0	1	3	0	0	0	4	1	0	1	2	0	6	0	1	0	1	0	0
P08	Psychotherapist	2	I often refer folks for psychiatric support with medications if they're struggling to function. This has been helpful in the early stages to assist the flight or flight system. I support clients in grounding and breathing exercises to counter panic attacks. Providing reassurance. Supporting clients in NOT using any more psychoactive substances unless prescribed (they usually don't want to). Suppo…		1		1		1	1		1	1			1				1	1							1						1
P09	Psychotherapist	2	1. Parts work modalities that work with the multiplicity of self and have a focus on integration and internal harmony ie Structural Dissociation. This is very useful especially for working with 'protector parts' that were blasted through, generally non-consensually, through working with psychedelics. There is generally backlash from these parts and they come back online with greater intensity. Th…																	1				1	1	1								1
P10	Psychotherapist	2	Lack of preparedness or ontological shock - retrospectively exploring belief systems and how the experience has challenged the individuals sense of reality. Often integration groups can also be useful to help find community and share these experiences with others who have had similar experiences. I might also suggest reading material such as The spiritual Emergence book by Stan Grof or Breaking O…		1		1							1		1	1			1														1	1
P11	Psychotherapist	2	Working hand in hand with a therapist who can understand both realms the therapeutic and the psychedelic to be able to blend these two perspectives smoothly to provide a deep integration. Preparation is of outmost importance to clarify expectations and sets balanced position towards what is found or can be during the work with psychedelics. People must understand how their own subjectivity is at …																												1			1					1
P12	Psychotherapist	2	Can't do "type of difficulty" = "tactics" because, as a person-centred and existential therapist, I work with the whole person, their history and desired way forward, not any sense that could be translated into expert diagnosis and treatment. So, I'll say something about my "transdiagnostic" way of thinking, which I apply across the three difficulties mentioned earlier and others. In short, it is…	1																	1										1			1	1	1
P13	Psychotherapist	2	Heightened sensitivity/Openness: Creating community support through integration groups or connecting with others who may be able to directly relate and/or engaging family members in the process as appropriate. Unmet expectations: While this may not be a classic challenging experience as defined in the initial research, the disengagement from the integration process because of heightened or unreal…		1	1		1	1	1		1				1	1			1						1
P14	Psychotherapist	2	Psychotherapy and integration therapy. I am an Art Psychotherapist originally and I use creative techniques in therapy to aid the integration process of psychedelic experiences.								1																							1
SUM Psychotherapists		N = 7		1	3	1	2	1	2	2	1	2	1	1	0	3	2	0	0	4	2	0	0	1	1	2	0	1	0	0	2	0	0	6	2	1	0	0	1	0
P15	Integration coach	3	I focus 75% of my work on preparation and am up front about the reality of the process. I mention the afterglow and how every state is temporary and there is a pattern of expansion & contraction. This helps my clients to accept and allow their feelings to come and go. I’m also very clear that one journey is not a magic bullet and I teach them how to build a relationship with psilocybin, as oppose…																							1	1	1					1	1					1
P16	Integration coach	3	I often start with mindfulness techniques of looking very carefully at where the challenges/pain/discomfort is. Looking separately at body sensations and thoughts. Often people are so caught up in the thoughts and narrative they are disconnected or unaware of what's really happening in their body. So I help them attune to the sensations in their body in a compassionate or validating way. Help bri…	1	1													1	1	1	1				1	1								1
P17	Integration coach	3	For anxiety, I often lead with somatic and mindfulness practices that encourage the client to move their awareness from their repetitive thoughts to sensations and observations. It helps to interrupt the pattern. When there is some semblance of calm, we can discuss the nature of anxious thoughts, which usually contain many cognitive distortions and logical fallacies. We can then work to unpack th…		1												1	1	1							1								1		1			1
P18	Integration coach	3	It all depends on what the difficult experience brought about in the person. I am very big on psychoeducation and attachment-based in order to help co-regulate and stabilize someone after a difficult psychedelic experience. I use a combination of Trauma-Trained methods that are nervous system and transpersonal based. Often I will use the combination of Somatic Experiencing and Internal Family Sys…		1	1	1	1		1				1	1							1	1		1	1		1	1	1				1
P19	Integration coach	3	It is all about support. Integration is important to help navigate these new experiences, the change (they thought they wanted), the fears and insecurities that can come up. They can change but their environment of family does not change with them. This can pose a difficulty. Coaching and integration can help navigate this. We provide specific documentation to help clients along. Plus we're alway…											1
P20	Integration coach	3	1) mood swings: being with the feelings that come up, not aiming to make them go away immediately. Depending on the client the approaches that helped were: talking about it and just being with the mood that is present, using some emotional release techniques, body movement, painting, listening to music and sometimes just the acceptance that this might be part of the process and it doesn´t mean th…	1	1	1	1	1		1	1						1					1				1								1	1		1	1
P21	Integration coach	3	Acceptance: helping them to accept what did happen, what they got out of it, and even the challenges they are facing. This required helping them shift out of a victim approach. Authority over the narrative: helping them to create meaning and pull out messages that are meaningful to them. Gentle self care: encouraging them to be very gentle and kind with themselves as they navigate the challenges.…	1										1				1	1	1															1
SUM Integration coaches		N = 7		3	4	2	2	2	0	2	1	0	0	3	1	0	2	3	3	2	1	2	1	0	2	5	1	2	1	1	0	0	1	5	2	1	1	1	2	0
P22	Retreat guide, facilitator, chaplain	4	1. Societal/ Environment: space is essential. It is recommended that there buffering space between their experience and returning back to their regular routine and environment. A quiet location, for 3-7 days is recommended to integrate the experience before returning back. 2. Compartmentalization: the key here is preparation. Letting participants know beforehand that compartmentalization attempts…														1		1							1					1			1	1				1
P23	Retreat guide, facilitator, chaplain	4	The most significant I have seen is the presence of a committed facilitator or therapist who can provide emotional support & validation for their experience. This also must be balanced by skillful therapeutic engagement which continues to pinpoint the psychological sources of the distress and work with the guests to reconstruct their understanding of themselves based on their experiences in the d…															1	1	1					1									1
P24	Retreat guide, facilitator, chaplain	4	A strong therapeutic container, with the ability to find meaning in challenging experiences. A strong understanding on the part of the therapist on different metaphysical and psychological maps of consiousness. Strong screening processes- anyone with weak internal supports, in crisis or overwhelm, with suicidal ideation, should be very carefully considered (as well as the usual contraindications)…		1	1														1														1				1	1
P25	Retreat guide, facilitator, chaplain	4	1) Check vital signs regularly; Blood pressure, pulse, oxygen saturation. If machinery is too cumbersome or intervenes in the process, knowing how to do so without the equipment. Reassuring the client that that they are okay and doing well. Often difficult experiences can lead one to think they have something going on with their heart, and get more scared, so revising them and assuring them that …									1									1	1																	1	1
P26	Retreat guide, facilitator, chaplain	4	In all cases, it seems connection serves the client best, both while coming off the medicine and in the weeks and months following. This is achieved through having facilitators present even after the ceremony, conducting sharing circles the next day, as well as online integration possibilities in the weeks following. In severe cases, when common practices don't or can't apply, a more supportive r…													1																		1
P27	Retreat guide, facilitator, chaplain	4	A mix of group psychotherapy, support, and individual therapy seems like the best and most effective way to support people having difficulties after psychedelic experiences. There are also also other practices such as journaling, meditation, exercise, etc that are supportive		1			1								1																		1
P28	Retreat guide, facilitator, chaplain	4	In my experience it is best to support each individual through the process as everyone has unique needs. I also focus heavily on vetting the health of each patient prior to their journey and working through their experience during the integration process.																																			1
SUM Retreat facilitators/guides		N = 7		0	2	1	0	1	0	0	1	1	0	0	0	2	1	1	2	2	1	1	0	0	1	1	0	0	0	0	1	0	0	5	1	0	0	2	3	1

## Sheet: Difficulties Themes
	THEME	Psychiatrist	Therapists	Integration coach	Retreat facilitator	Total	Example quote	Comment
26	Existential struggle and crisis	3	5	2	5	15
9	Anxiety and/or panic	4	5	2	0	11
33	Self-Perception Issues	5	2	3	0	10
30	Dissociative symptoms	4	2	2	1	9
23	Becoming conscious of repressed material	1	2	2	3	8
21	Unmet expectations and disappointment	2	2	2	1	7
1	Sense of social alienation or disconnection	1	1	1	3	6
10	Paranoia	2	2	1	1	6
24	Traumatized or hurt by trip or occurrence after	2	1	2	1	6
5	Cognitive confusion	2	1	1	1	5
13	Manic or hypomanic episode	2	1	1	1	5
35	Difficulty with performing daily tasks	2	2	0	1	5
6	Fixated or intrusive thoughts	1	2	1	0	4
11	Feeling unsafe or out of control	0	2	1	1	4
18	Emotional overwhelm	0	0	2	2	4
2	Visual / auditory hallucinations or disturbance	3	0	0	0	3
3	Flashbacks / feeling of experience being repeated	2	0	1	0	3
8	Difficulty with concentration and focusing	3	0	0	0	3
14	Depression	1	1	0	1	3
15	Shame and/or guilt	0	1	1	1	3
31	Psychotic like symptoms	2	0	0	1	3
4	Sleep problems and nightmares	1	0	0	1	2
12	Low mood / bad mood / sadness / anhedonia	0	1	1	0	2
16	Anger and irritability	0	0	1	1	2
19	Fluctuating emotions and mood swings	1	0	1	0	2
20	Hyperarousal / hypersensitivity / hypervigilance	0	1	1	0	2
22	Feelings of grief and remorse	0	0	0	2	2
7	Forgetfulness / memory issues	1	0	0	0	1
17	Suicidal thoughts	0	0	1	0	1
29	Sense of demonic or hostile presence	1	0	0	0	1
36	Substance use / abuse	1	0	0	0	1

## Sheet: Support Themes
THEME	Psychiatrist	Therapists	Integration coach	Retreat facilitator	Total	Example quote	Comment
Individual psychotherapy	6	6	5	5	22
Meditation and grounding practices	3	3	4	2	12
Peer support and integration groups	3	3	0	2	8
Helping to make sense of the experience	0	4	2	2	8
Compassionate, non-judgemental presence & listening	1	2	4	1	8
Psychiatric medication	4	2	0	1	7
Facilitating self-understanding	1	0	3	2	6
Encouraging acceptance	1	1	3	0	5
Being in nature	1	1	2	1	5
Breathing strategies and breathwork	1	2	2	0	5
Physical Exercise and movement practices	1	1	2	1	5
Providing reassurance	1	2	1	1	5
Normalising the challenge	0	2	2	1	5
Diet-based strategies	0	2	2	0	4
External acceptance and validation	0	0	3	1	4
music	0	0	2	1	3
Creative strategies	0	1	1	1	3
support finding purpose and self actualisation	1	1	1	0	3
traditional healing practices	1	0	1	0	2
Sleep and rest	0	1	0	0	1
plant medicine	0	0	1	0	1
Abstaining from particular substances	0	1	0	0	1
Therapy subthemes
Somatic therapies and practices	0	2	5	1	8
EFT	0	0	1	0	1
attachment-based therapeutic work	0	0	1	0	1
anger-based practices	0	0	1	0	1
ACT	1	0	1	0	2
Transpersonal, hypnosis, trance	1	0	1	0	2
CBT	2	0	0	0	2
EMDR	3	1	0	0	4
Parts work modalities (including IFS)	0	1	2	1	4
person centred and tailored	1	2	0	1	4
Trauma work (TRE, trauma processing)	4	1	2	0	7
Psychoeducation based therapy	1	1	3	0	5
